# Supplementary material for: Modeling the interactions between peptide functions and Sr2+: formamide–Sr2+ reactions in the gas phase
Source: Royal Society of Chemistry journal article supplement (doi:10.1039/c1cp21578g), 2011-01-01
Supplement: c1cp21578g.pdf [file c1cp21578g.pdf]

## **Modeling the interactions between peptide functions and Sr<sup>2+</sup>:**

### **Formamide-Sr<sup>2+</sup> reactions in the Gas Phase**

Ane Eizaguirre, Otilia Mó, Manuel Yáñez, Jean-Yves Salpin

*Contribution from Departamento de Química, Módulo 13, Universidad Autónoma de Madrid. Cantoblanco, Campus de Excelencia UAM-CSIC, 28049-Madrid (Spain) and Laboratoire Analyse et Modélisation pour la Biologie et l'Environnement (LAMBE), Université d'Evry Val d'Essonne – CNRS – Bâtiment Maupertuis – Boulevard François Mitterrand, 91025 Evry, France*

**Supporting Information (A total of 2 pages)**

**Table S1.** Energies were calculated with G96LYP functional and with an expanded LAN2DZ basis set for the  $\text{Sr}^{2+}$  cation, and 6-311+G(3df,2p) basis set for C, O, N and H atoms. Zero-Point Vibrational energies were calculated with G96LYP functional and an improved LAN2DZ basis set for the  $\text{Sr}^{2+}$  cation and with 6-31+G(d,p) basis set for C, O, N and H atoms. All values are in hartrees.

|             | <b>Energy</b> | <b>ZPVE</b> |
|-------------|---------------|-------------|
| <b>1</b>    | -199.8266053  | 0.047084    |
| <b>2</b>    | -199.7446179  | 0.044135    |
| <b>3</b>    | -199.7906672  | 0.046499    |
| <b>4</b>    | -199.7822307  | 0.046538    |
| <b>5</b>    | -199.805685   | 0.041279    |
| <b>6</b>    | -199.7807166  | 0.040973    |
| <b>7</b>    | -199.7721218  | 0.043414    |
| <b>8</b>    | -199.7520549  | 0.045105    |
| <b>TS11</b> | -199.771644   | 0.045178    |
| <b>TS12</b> | -199.7259154  | 0.040471    |
| <b>TS23</b> | -199.7404989  | 0.043550    |
| <b>TS34</b> | -199.7370156  | 0.044236    |
| <b>TS45</b> | -199.6973997  | 0.039367    |
| <b>TS56</b> | -199.7782474  | 0.041239    |
| <b>TS17</b> | -199.7015365  | 0.039623    |
| <b>TS18</b> | -199.6802649  | 0.039372    |
| <b>TS2A</b> | -199.7378161  | 0.040304    |
| <b>TS6A</b> | -199.7540128  | 0.039662    |
